# Supplementary material for: GPER is involved in the regulation of the estrogen-metabolizing CYP1B1 enzyme in breast cancer
Source: PubMed Central journal article supplement (PMC5739760; doi:10.18632/oncotarget.22541), 2017-11-20
Supplement: oncotarget-08-106608-s001.pdf [file oncotarget-08-106608-s001.pdf]

## GPER is involved in the regulation of the estrogen-metabolizing CYP1B1 enzyme in breast cancer

### SUPPLEMENTARY MATERIALS

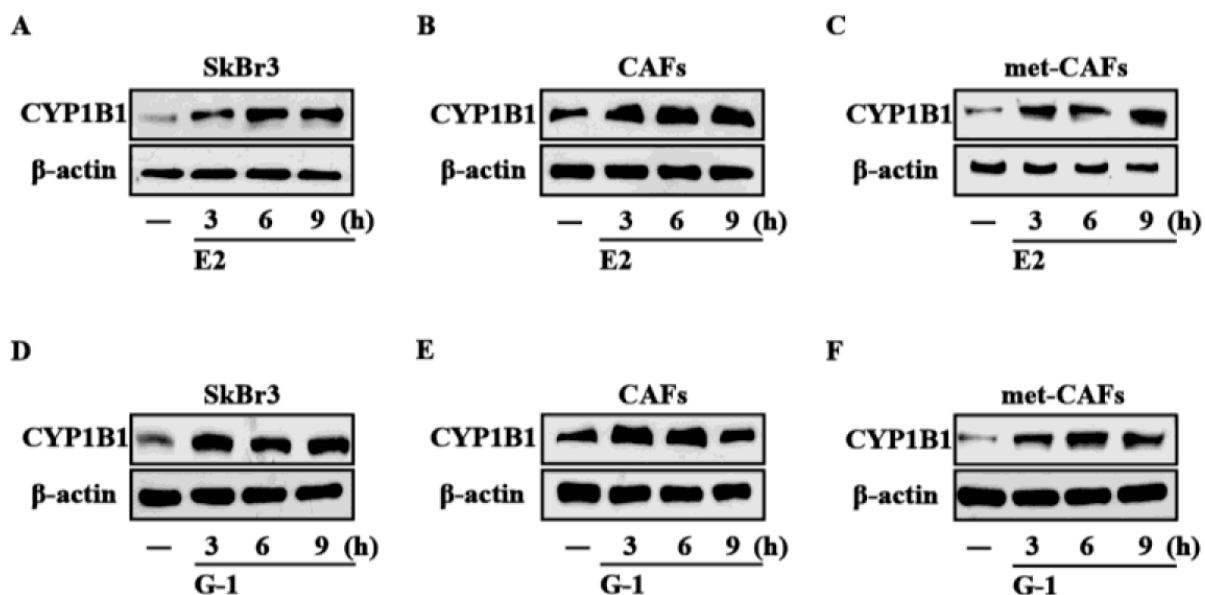

Supplementary Figure 1: GPER mediates CYP1B1 protein induction by E2 and G-1 in SkBr3 cells, CAFs and met-CAFs. Evaluation of CYP1B1 protein levels in SkBr3 cells, CAFs and met-CAFs treated with 10 nM E2 (A–C) and 100 nM G-1 (D–F), as indicated.  $\beta$ -actin serves as a loading control. Results shown are representative of at least two independent experiments.

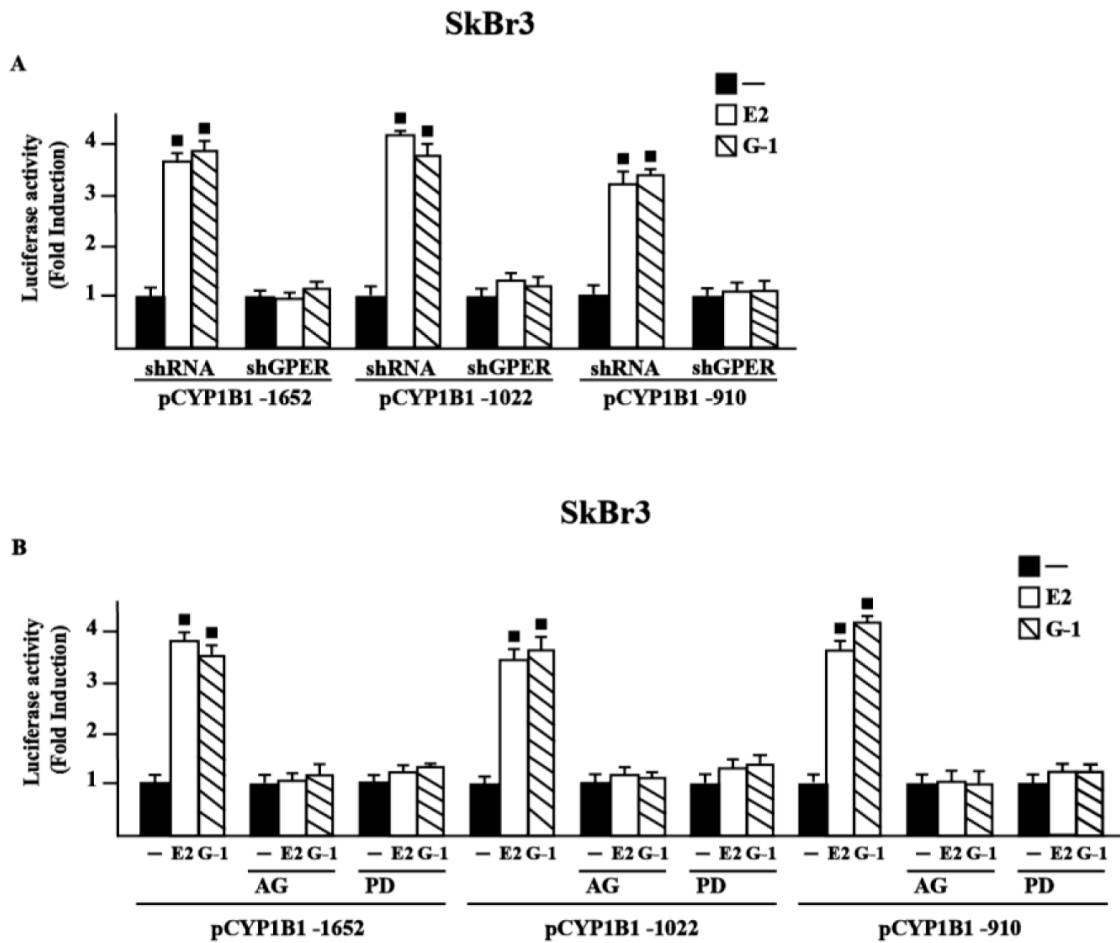

**Supplementary Figure 2: GPER mediates the transactivation of CYP1B1 promoter constructs induced by E2 and G-1 in SkBr3 cells.** (A) SkBr3 cells were transfected for 24 h with shRNA or shGPER, then transfected for 8 h with CYP1B1 promoter constructs and thereafter treated for 18 h with vehicle (-), 10 nM E2 and 100 nM G-1, as indicated. (B) Luciferase activities of CYP1B1 promoter constructs in SkBr3 cells treated for 18 h with vehicle, 10 nM E2, 100 nM G-1 alone or in combination with 10  $\mu$ M EGFR inhibitor AG1478 (AG) and 10  $\mu$ M MEK inhibitor PD98059 (PD), as indicated. The luciferase activities were normalized to the internal transfection control and values of cells receiving vehicle were set as 1-fold induction upon which the activities induced by treatments were calculated. Each column represents the mean  $\pm$  SD for three independent experiments, each performed in triplicate. (■) indicates  $P < 0.05$  for cells receiving treatments versus vehicle.

### SkBr3

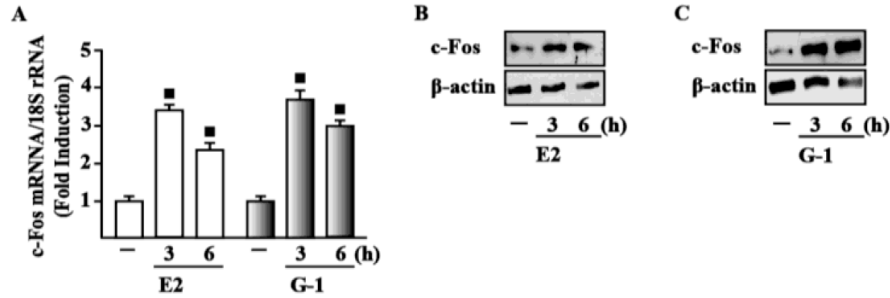

### CAFs

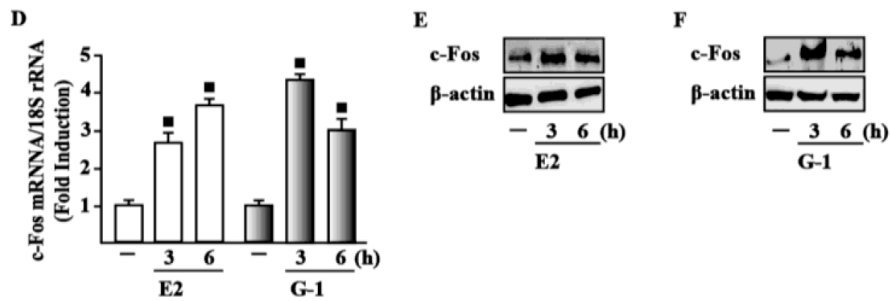

### met-CAFs

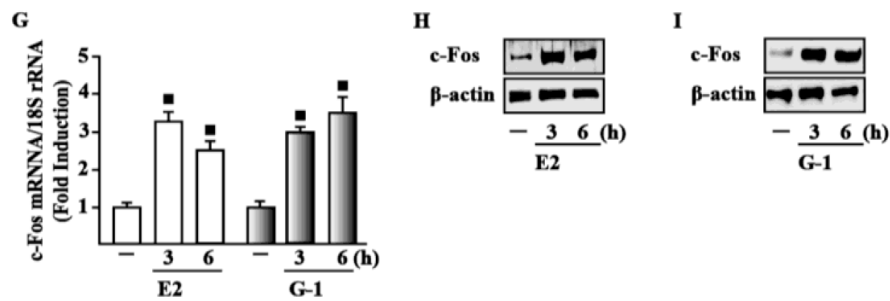

**Supplementary Figure 3: E2 and G-1 stimulate c-Fos expression in SkBr3 cells, CAFs and met-CAFs.** c-Fos mRNA expression by real-time PCR in SkBr3 cells (A), CAFs (D) and met-CAFs (G) treated with vehicle (-), 10 nM E2 and 100 nM G-1, as indicated. Data obtained in three independent experiments performed in triplicate were normalized to 18S expression and shown as fold changes of CYP1B1 expression upon E2 and G-1 treatments respect to cells treated with vehicle. (■)  $P < 0.05$  for cells receiving treatments versus vehicle. c-Fos protein levels in SkBr3 cells (B-C), CAFs (E-F), met-CAFs (H-I) treated with vehicle, 10 nM E2 and 100 nM G-1, as indicated.  $\beta$ -actin serves as a loading control. Results shown are representative of at least two independent experiments.
